# Supplementary material
Source: PubMed Central journal article supplement (PMC4084544)
Supplement: rstb20130259supp1.pdf [file rstb20130259supp1.pdf]

Stock, AJ, Campitelli, BE and Stinchcombe, JR. 2014. Quantitative genetic variance and multivariate clines in the Ivyleaf morning glory, *Ipomoea hederacea*. *Phil. Trans. R. Soc. B.* **369** doi: 10.1098/rstb.2013.0259

## **Supplementary material**

### **Supplemental methods:**

We used the AFLP data presented in Campitelli and Stinchcombe [1] to evaluate  $F_{ST}$  and isolation by distance in the 20 populations used here. For a full analysis of population structure, differentiation, and autocorrelation in AFLP allele frequencies in a larger population sample (77 populations), see Campitelli and Stinchcombe [1]. We estimated  $F_{ST}$  using Hickory [2], to obtain both pairwise  $F_{ST}$  and credibility intervals. We used the theta-II values from the f-free model of Hickory, which are directly comparable to  $F_{ST}$  from Weir & Cockerham's [3] approach. For the set of 20 populations used here, Hickory utilized 170 AFLP loci. We found an overall average  $F_{ST}$  of 0.024 (credibility interval: 0.017 – 0.032). To examine neutral population structure, we regressed pairwise  $F_{ST}$  on pairwise geographic distance;  $F_{ST}$  was transformed as  $F_{ST}/(1 - F_{ST})$  for these analyses, following Rousset [4]. We failed to detect any pattern of isolation by distance ( $P = 0.67$ ; Figure S1).

### References for supplemental methods:

1. Campitelli B.E., Stinchcombe J.R. 2013 Natural selection maintains a single-locus leaf shape cline in Ivyleaf morning glory, *Ipomoea hederacea*. *Molecular Ecology* **22**(3), 552-564. (doi:10.1111/mec.12057).
2. Holsinger, K.E., Lewis, P.O. 2003. Hickory: a package for analysis of population genetic data v1.1. Storrs, CT, USA: University of Connecticut.
3. Weir, B.S., Cockerham, C.C. 1984 Estimating F-statistics for the analysis of population-structure. *Evolution* **38**: 1358-1370.
4. Rousset, F. 1997 Genetic differentiation and estimation of gene flow from F-statistics under isolation by distance. *Genetics* **145**:1219–1228.

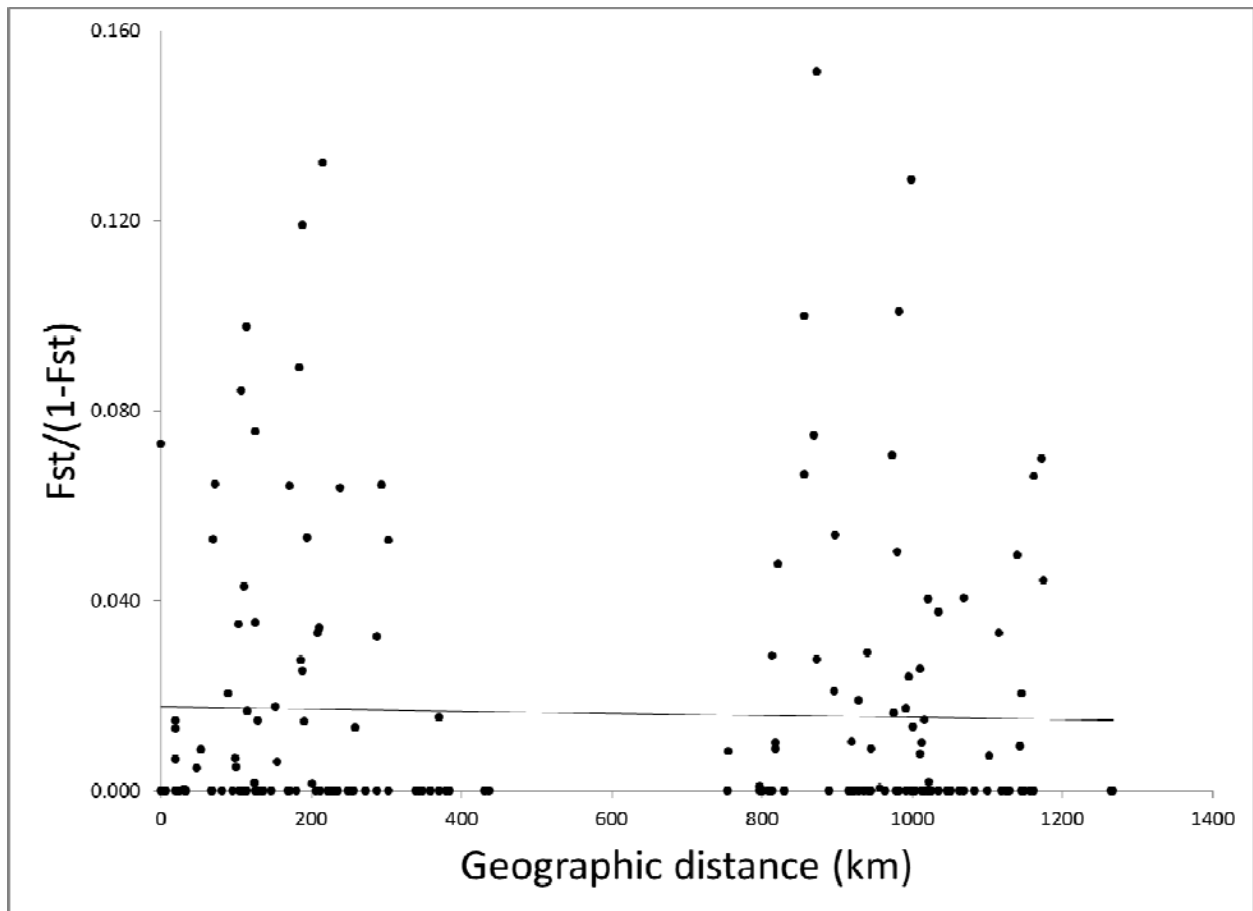

**Figure S1:** Plot of isolation by distance, portrayed as  $F_{ST}/(1 - F_{ST})$  plotted against pairwise geographic distance between populations, based on 170 AFLP loci. The relationship is not significant.

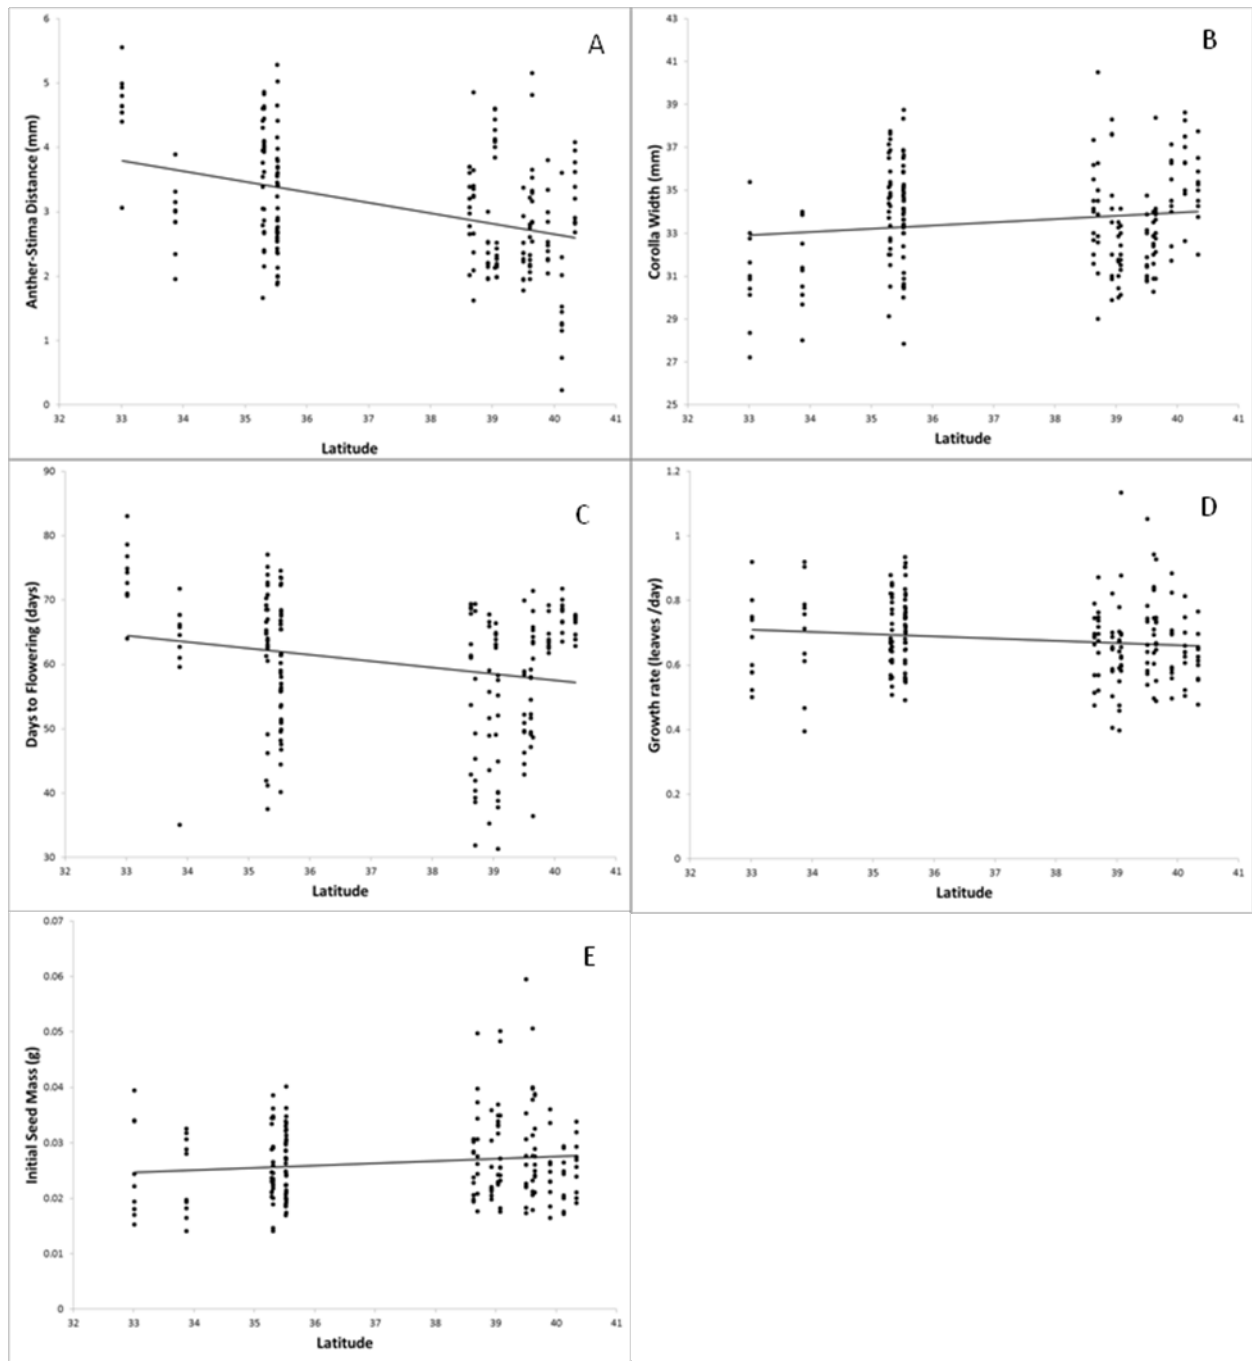

**Figure S2a-e:** Latitudinal clines in quantitative traits. Plotted are inbred line means for phenotypes against latitude. (A) Anther-stigma distance, (B) Corolla width, (C) Days to flower, (D) Growth rate, and (E) Seed mass.
